# Supplementary material
Source: Springer Nature journal article supplement (https://www.springermedizin.de/resource/supplementary/12885_2003_108_MOESM4_ESM.pdf/9468914)

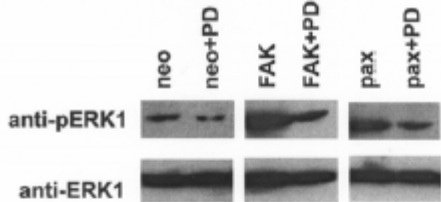

**B**

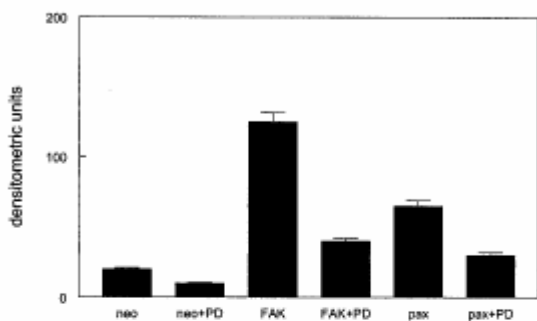

**C**

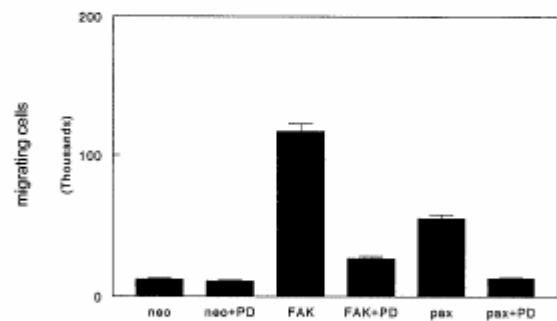

**D**

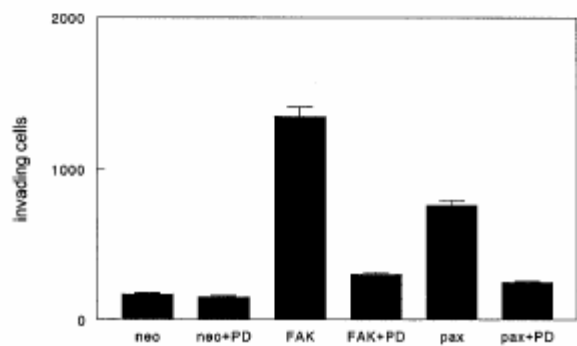

Supplement: MOESM4 [file 9468914]
